# Supplementary material
Source: PubMed Central journal article supplement (PMC6071733)
Supplement: EHP1575.s001.acco.pdf [file EHP1575.s001.acco.pdf]

**Note to readers with disabilities:** *EHP* strives to ensure that all journal content is accessible to all readers. However, some figures and Supplemental Material published in *EHP* articles may not conform to [508 standards](#) due to the complexity of the information being presented. If you need assistance accessing journal content, please contact [ehp508@niehs.nih.gov](mailto:ehp508@niehs.nih.gov). Our staff will work with you to assess and meet your accessibility needs within 3 working days.

## **Supplemental Material**

### **Neonatal Genistein Exposure and Glucocorticoid Signaling in the Adult Mouse Uterus**

Shannon D. Whirlledge, Edwina P. Kisanga, Robert H. Oakley, and John A. Cidlowski

#### **Table of Contents**

**Figure S1.** Relative mRNA expression of *Ppib*, *Gilz*, and *Fkbp5* measured by qRT-PCR in total RNA isolated from the uterus of adult, intact C57Bl/6 mice following neonatal exposure to control (corn-oil) or 50 mg/kg genistein. Bar graphs show the mean  $\pm$  SEM from 4-5 animals.

**Figure S2.** Uterine/body weight ratios were determined by measuring the uterine and body weight (g) in adrenalectomized and ovariectomized C57Bl/6 mice 24 hr following intraperitoneal injection of vehicle (saline) or 10  $\mu$ g/kg E<sub>2</sub>. Bar graphs show the mean  $\pm$  SEM from 4-7 animals. \*\*p<0.01 as determined by ANOVA with Tukey's post-hoc analysis.

**Figure S3.** Canonical glucocorticoid receptor (GR) signaling distinct following neonatal exposure to genistein. Ingenuity Pathway Analysis identified GR signaling as the top canonical pathway regulated by dexamethasone (Dex) in the uteri of control and genistein-exposed mice. Comparison of differentially expressed genes was visualized from the control and genistein-exposed groups. Red represents induction of gene expression and green indicates repression of gene expression.

**Figure S4.** IPA comparison analysis of the 1033 significantly regulated genes common to the control and genistein groups. The top five canonical pathways and diseases and biological functions were ranked and assigned an activation z-score (orange = induced; blue = repressed).

**Figure S5.** Reference protein  $\beta$ -actin protein expression in vehicle and genistein-treated mice. Arbitrary values from genistein-exposed mice were set relative to values from control mice. The results represent the mean of 4 animals  $\pm$  SEM.

**Table S1.** TaqMan Real-Time PCR Primers.

**Table S2.** Antibodies.

**Table S3.** ChIP qPCR Primer-Probe Sets.

**Table S4.** Expression of Glucocorticoid Responsive Genes in the Mouse Uterus at Postnatal Day 5, Postnatal Day 21, and Postnatal Day 56 Following Early-Life Genistein Exposure Dexamethasone.

**Table S5.** The Top Ten Induced and Repressed Genes as Determined by Fold Change in the Uteri of Neonatal Genistein Exposed Mice Compared to Control.

**Table S6.** Genes Differentially Regulated by Glucocorticoids in the Uterus of Control and Neonatal Genistein Exposed Mice.

**Table S7.** The Top Ten Diseases and Biological Functions Enriched in Glucocorticoid-Responsive Genes from the Uteri of Control and Neonatal Genistein Exposed Mice.

**Table S8.** Gene Ontology Analysis of Genes Differentially Regulated in Response to Dexamethasone from Uterine Tissue of Postnatal Control Animals.

**Table S9.** Gene Ontology Analysis of Genes Differentially Regulated in Response to Dexamethasone from Uterine Tissue of Postnatal Genistein Treated Animals.

**Table S10.** Anti-correlated genes commonly regulated in control and genistein-exposed mice.

## Supplemental Data and Figures

Figure S1

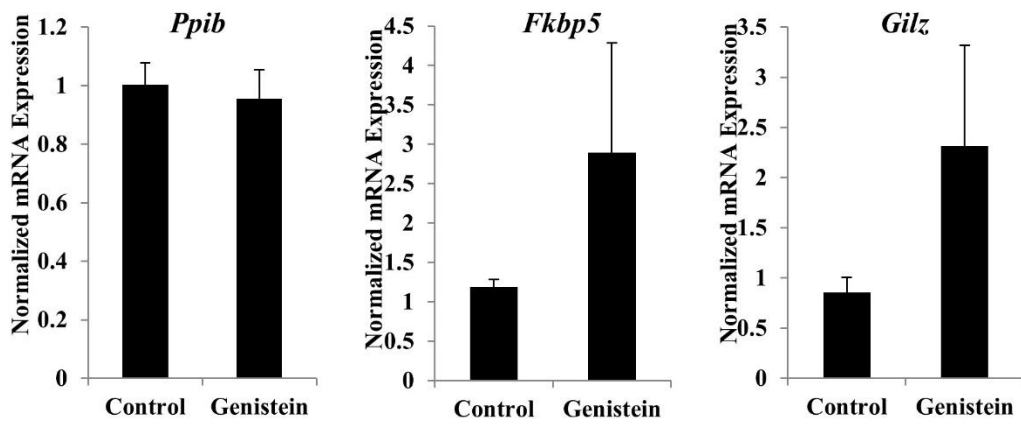

**Figure S1.** Relative mRNA expression of *Ppib*, *Gilz*, and *Fkbp5* measured by qRT-PCR in total RNA isolated from the uterus of adult, intact C57Bl/6 mice following neonatal exposure to control (corn-oil) or 50 mg/kg genistein. Bar graphs show the mean  $\pm$  SEM from 4-5 animals.

**Figure S2**

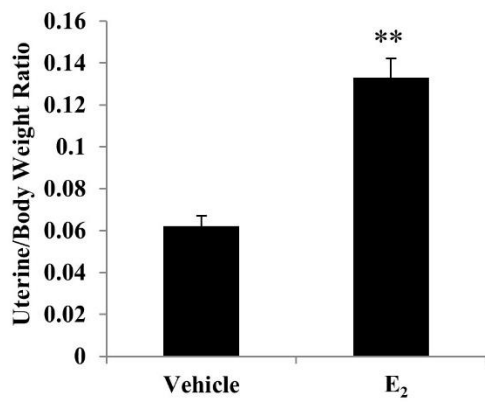

**Figure S2.** Uterine/body weight ratios were determined by measuring the uterine and body weight (g) in adrenalectomized and ovariectomized C57Bl/6 mice 24 hr following intraperitoneal injection of vehicle (saline) or 10 µg/kg E<sub>2</sub>. Bar graphs show the mean ± SEM from 4-7 animals. \*\*p<0.01 as determined by ANOVA with Tukey's post-hoc analysis.

Figure S3

**A** Control

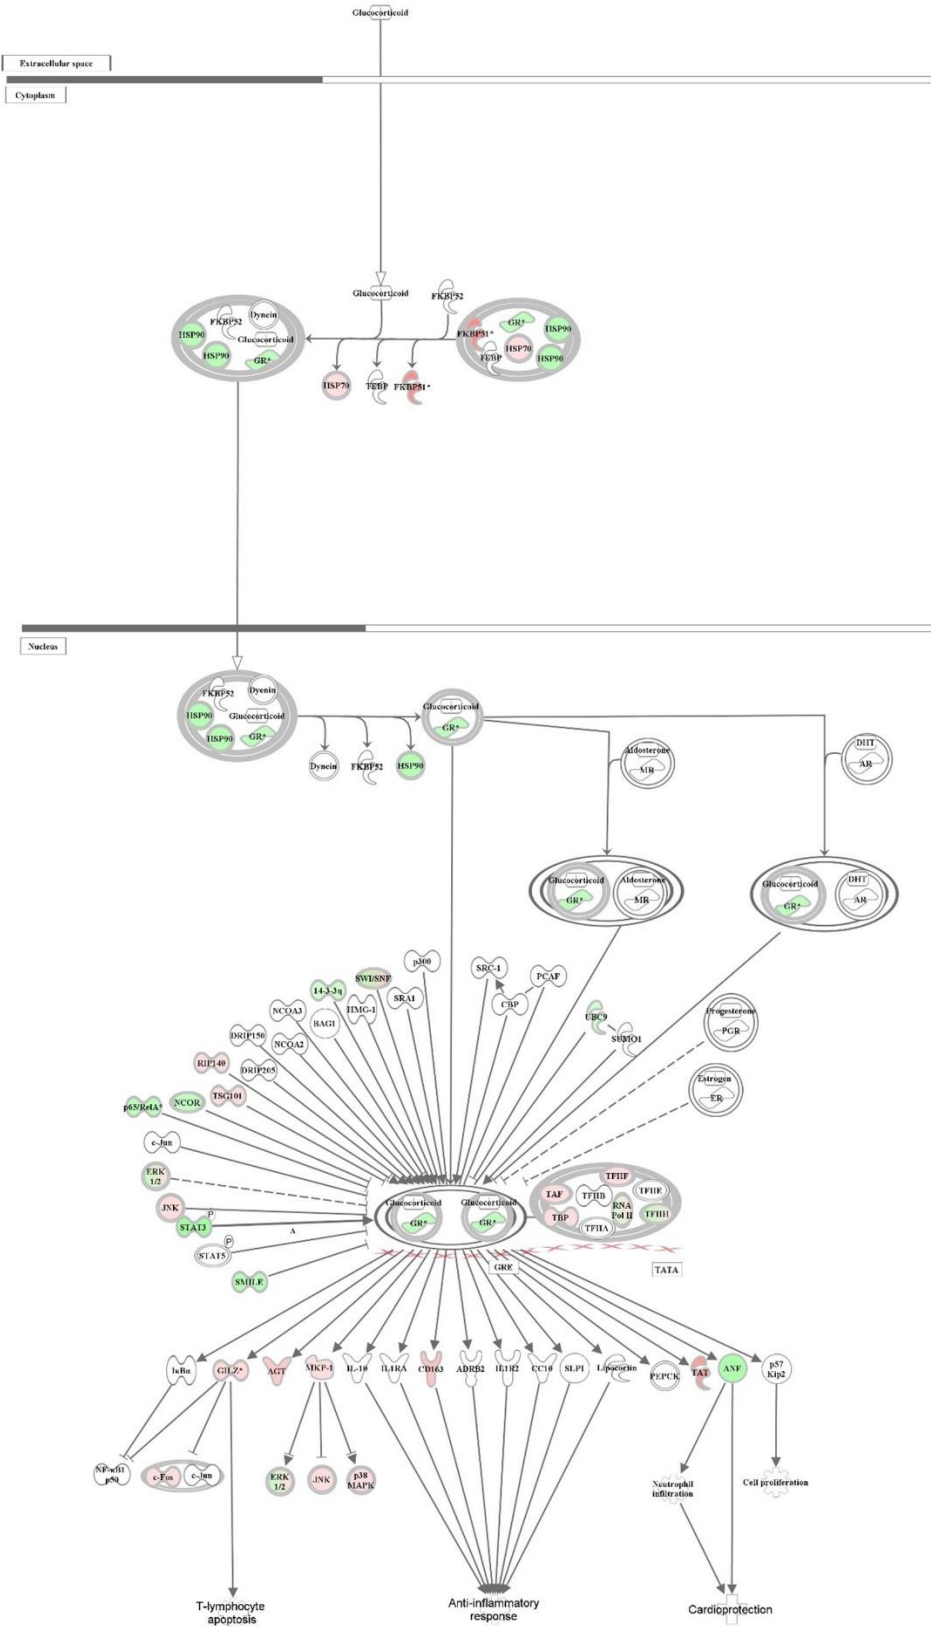

# B Genistein

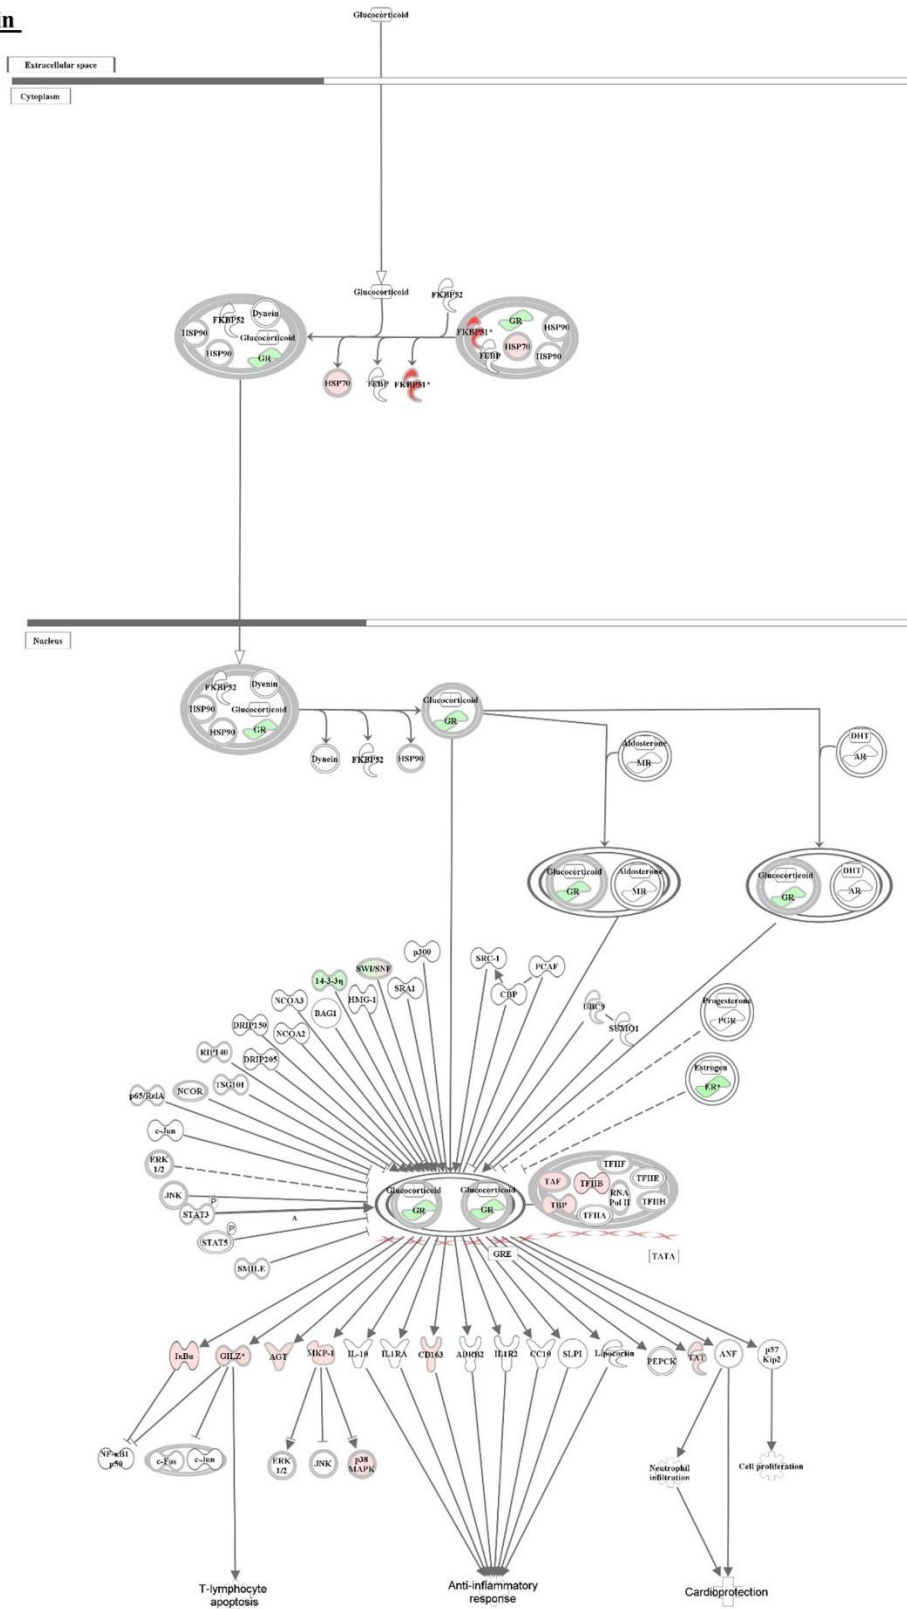

**Figure S3.** Canonical glucocorticoid receptor (GR) signaling distinct following neonatal exposure to genistein. Ingenuity Pathway Analysis identified GR signaling as the top canonical pathway regulated by dexamethasone (Dex) in the uteri of control and genistein-exposed mice. Comparison of differentially expressed genes was visualized from the control and genistein-exposed groups. Red represents induction of gene expression and green indicates repression of gene expression.

Figure S4

**Canonical Pathways**

1. Cardiac Hypertrophy Signaling
2. Gαi Signaling
3. Calcium-induced T Lymphocyte Apoptosis
4. PCKθ Signaling in T Lymphocytes
5. mTOR Signaling

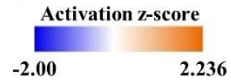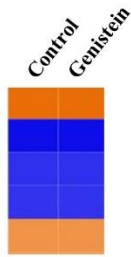

**Diseases and Biological Functions**

1. Cell Movement of Granulocytes
2. Cell Movement of Neutrophils
3. Homing of Leukocytes
4. Cell Movement of Leukocytes
5. Chemotaxis of Phagocytes

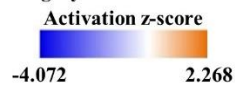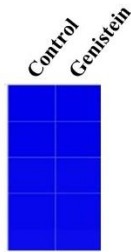

**Figure S4.** IPA comparison analysis of the 1033 significantly regulated genes common to the control and genistein groups. The top five canonical pathways and diseases and biological functions were ranked and assigned an activation z-score (orange = induced; blue = repressed).



**Figure S5**

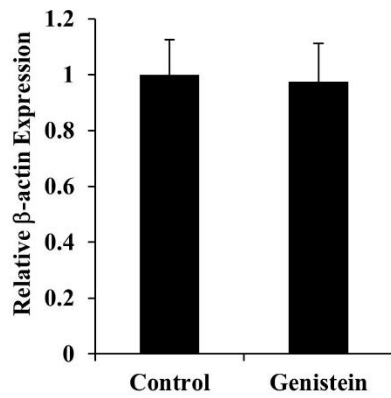

**Figure S5.** Reference protein  $\beta$ -actin protein expression in vehicle and genistein-treated mice. Arbitrary values from genistein-exposed mice were set relative to values from control mice. The results represent the mean of 4 animals  $\pm$  SEM.

**Table S1: TaqMan Real-Time PCR Primers**

| <b>Primer</b> | <b>Gene</b>     | <b>Description</b>                      | <b>Amplicon Length</b> | <b>Assay Design</b>                             |
|---------------|-----------------|-----------------------------------------|------------------------|-------------------------------------------------|
| Mm01326794_m1 | <i>Adamtsl2</i> | ADAMTS Like 2                           | 69                     | Probe spans exons                               |
| Mm01151063_m1 | <i>Dnmt1</i>    | DNA (cytosine-5)-methyltransferase 1    | 58                     | Probe spans exons                               |
| Mm00432881_m1 | <i>Dnmt3a</i>   | DNA (cytosine-5)-methyltransferase 3A   | 58                     | Probe spans exons                               |
| Mm01240113_m1 | <i>Dnmt3b</i>   | DNA (cytosine-5)-methyltransferase 3B   | 83                     | Probe spans exons                               |
| Mm00487406_m1 | <i>Fkpb5</i>    | FK506 binding protein 5                 | 74                     | Probe spans exons                               |
| Mm00726417_s1 | <i>Gilz</i>     | Glucocorticoid-induced leucine zipper   | 66                     | Both primers and probe map within a single exon |
| Mm02745760_g1 | <i>Hdac1</i>    | Histone deacetylase 1                   | 74                     | Probe spans exons                               |
| Mm00515108_m1 | <i>Hdac2</i>    | Histone deacetylase 2                   | 62                     | Probe spans exons                               |
| Mm00439613_m1 | <i>Ihh</i>      | Indian Hedgehog                         | 64                     | Probe spans exons                               |
| Mm00727486_s1 | <i>Klf13</i>    | Kruppel-like factor 13                  | 128                    | Both primers and probe map within a single exon |
| Mm00521967_m1 | <i>Mbd2</i>     | Methyl-CpG-binding domain protein 2     | 71                     | Probe spans exons                               |
| Mm01193537_g1 | <i>Mecp2</i>    | Methyl-CpG-binding protein 2            | 99                     | Probe spans exons                               |
| Mm00801489_m1 | <i>Ovgp1</i>    | Oviduct-specific glycoprotein           | 70                     | Probe spans exons                               |
| Mm00501813_m1 | <i>Per1</i>     | Period circadian clock 1                | 106                    | Probe spans exons                               |
| Mm00441380_m1 | <i>Sgk1</i>     | Serum/glucocorticoid regulated kinase 1 | 71                     | Probe spans exons                               |
| Mm00478295_m1 | <i>Ppib</i>     | Peptidylprolyl isomerase B              | 82                     | Probe spans exons                               |
| Mm00445641_m1 | <i>Retn</i>     | Resistin                                | 80                     | Probe spans exons                               |

**Table S2: Antibodies**

| <b>Antibody ID</b> | <b>Antibody</b>                                          | <b>Source</b>                            | <b>Catalog Number</b> | <b>Purpose</b>                                                           |
|--------------------|----------------------------------------------------------|------------------------------------------|-----------------------|--------------------------------------------------------------------------|
| AB_11179215        | Glucocorticoid Receptor (D8H2) XP® Rabbit mAb            | Cell Signaling Technologies, Beverly, MA | 3660S                 | Immunofluorescence (1:500)<br>Western blotting (1:1,000)<br>ChIP (1:175) |
| AB_2620142         | Ki-67 (D3B5) Rabbit mAb (Alexa Fluor® 488 Conjugate)     | Cell Signaling Technologies, Beverly, MA | 12202                 | Immunofluorescence (1:400)                                               |
| AB_2223041         | Anti-Actin Antibody, clone C4                            | Millipore, Temecula, MA                  | MAB1501               | Western blotting (1:10,000)                                              |
| AB_10956389        | Goat anti-rabbit IRDye 680-conjugated secondary antibody | LI-COR Biosciences, Lincoln, NE          | 926-68171             | Western blotting (1:10,000)                                              |
| AB_10793856        | Goat anti-mouse IRDye 800-conjugated secondary antibody  | LI-COR Biosciences, Lincoln, NE          | 827-08364             | Western blotting (1:10,000)                                              |
| AB_145841          | Normal rabbit IgG                                        | Millipore, Temecula, MA                  | 12-370                | ChIP (1:700)                                                             |

**Table S3: ChIP qPCR Primer-Probe Sets**

| Gene         | Description                             | Primer DNA Sequences                                           | Probe Sequence                 |
|--------------|-----------------------------------------|----------------------------------------------------------------|--------------------------------|
| <i>Gilz</i>  | Glucocorticoid-induced leucine zipper   | 5'-ACCCTTGTGGTCATGGAATG-3'<br>5'-AGAAACCAGTGTGCTGAAAGA-3'      | 5'AGTACACTGAGCACACAACGTGCC-3'  |
| <i>Klf13</i> | Kruppel-like factor 13                  | 5'-AGGGAACACAACGTCCCATATGCT-3'<br>5'-ATTCAATCCCGGTGAGGGCTTT-3' | 5'-ACTGAGAACATGCTGTTCCCGCCA-3' |
| <i>Per1</i>  | Period circadian clock 1                | 5'-CCCTTCCTCCTAACTGTCTCT-3'<br>5'-TCGTGTTCTCTTGGCTGATG-3'      | 5'-TTTGTACAGGACCGCTGTCGTTGG-3' |
| <i>Sgk13</i> | Serum/glucocorticoid regulated kinase 1 | 5'-TCTAACTCGCCACCTCCT-3'<br>5'-GAACATTCTGTTCTTTCCGCATAA-3'     | 5'-ACGTGTTCTTGGCATGGCTAGGAT-3' |

**Table S4.** Expression of Glucocorticoid Responsive Genes in the Mouse Uterus at Postnatal Day 5, Postnatal Day 21, and Postnatal Day 56 Following Early-Life Genistein Exposure Dexamethasone

| Gene         | PND 5 Dex/Veh        |                        | PND 21 Dex/Veh       |                        | PND 56 Dex/Veh       |                        |
|--------------|----------------------|------------------------|----------------------|------------------------|----------------------|------------------------|
|              | Control <sup>a</sup> | Genistein <sup>b</sup> | Control <sup>a</sup> | Genistein <sup>b</sup> | Control <sup>a</sup> | Genistein <sup>b</sup> |
| <i>Gilz</i>  | +++                  | +++                    | +++                  | +++                    | +++                  | ++                     |
| <i>Fkbp5</i> | +++                  | +++                    | +++                  | +++                    | +++                  | +                      |
| <i>Sgk1</i>  | +++                  | +++                    | +++                  | +++                    | +++                  | +                      |
| <i>Per1</i>  | +++                  | +++                    | +++                  | +++                    | +++                  | +++                    |

<sup>a</sup>+++ represents a high degree of regulation of the respective glucocorticoid responsive gene in control mice as determined by comparing expression in dexamethasone-treated mice versus vehicle-treated mice at the postnatal day indicated.

<sup>b</sup>+++ represents a high degree of regulation of the respective glucocorticoid responsive gene in genistein-exposed mice as determined by comparing expression in dexamethasone-treated mice versus vehicle-treated mice at the postnatal day indicated. ++ represents a moderate degree of regulation of the respective glucocorticoid responsive gene in genistein-exposed mice as determined by comparing expression in dexamethasone-treated mice versus vehicle-treated mice at the postnatal day indicated. + represents a low degree of regulation of the respective glucocorticoid responsive gene in genistein-exposed mice as determined by comparing expression in dexamethasone-treated mice versus vehicle-treated mice at the postnatal day indicated.

**Table S5. The Top Ten Induced and Repressed Genes as Determined by Fold Change in the Uteri of Neonatal Genistein Exposed Mice Compared to Control**

| GeneName                                                         | GeneSymbol     | Fold-Change |
|------------------------------------------------------------------|----------------|-------------|
| Potassium channel, subfamily K, member 10                        | <i>Kcnk10</i>  | 6.52        |
| Glycogen synthase 2                                              | <i>Gys 2</i>   | 5.93        |
| Major urinary protein 2                                          | <i>Mup2</i>    | 5.50        |
| Olfactory receptor 447                                           | <i>Olfr447</i> | 4.79        |
| Carbonic anhydrase 3                                             | <i>Car3</i>    | 4.37        |
| Klotho beta                                                      | <i>Klb</i>     | 4.27        |
| Cytochrome P450, family 11, subfamily a, polypeptide 1           | <i>Cyp11a1</i> | 4.22        |
| Solute carrier family 36 (proton/amino acid symporter), member 1 | <i>Slc36a1</i> | 4.18        |
| Vomeronasal 1 receptor 22                                        | <i>Vmn1r22</i> | 3.92        |
| Leptin                                                           | <i>Lep</i>     | 3.82        |
| G1 to S phase transition 1                                       | <i>Gspt1</i>   | -3.58       |
| UV radiation resistance associated gene                          | <i>Uvrug</i>   | -3.72       |
| SR-related CTD-associated factor 4                               | <i>Scaf4</i>   | -3.76       |
| Solute carrier family 39 (metal ion transporter), member 8       | <i>Slc39a8</i> | -3.86       |
| Activating transcription factor 7                                | <i>Atf7</i>    | -3.87       |
| Phosphodiesterase 6H, cGMP-specific, cone, gamma                 | <i>Pde6h</i>   | -4.00       |
| Cytochrome P450, family 3, subfamily a, polypeptide 25           | <i>Cyp3a25</i> | -4.01       |
| Matrix metalloproteinase 16                                      | <i>Mmp16</i>   | -4.14       |
| Ankyrin repeat domain 55                                         | <i>Ankrd55</i> | -4.41       |

**Table S6. Genes Differentially Regulated by Glucocorticoids in the Uterus of Control and Neonatal Genistein Exposed Mice**

| Gene Name                                                       | Gene Symbol          | Control Dex/Veh <sup>a</sup> | Genistein Dex/Veh <sup>a</sup> |
|-----------------------------------------------------------------|----------------------|------------------------------|--------------------------------|
| Interleukin 13 receptor, alpha 2                                | <i>Il13ra2</i>       | 28.984                       | 85.706                         |
| L-amino acid oxidase 1                                          | <i>Lao1</i>          | 21.778                       | 33.203                         |
| Osteomodulin                                                    | <i>Omd</i>           | 20.522                       | 10.118                         |
| Dipeptidase 1 (renal)                                           | <i>Dpep1</i>         | 17.526                       | 34.233                         |
| ADAMTS-like 2                                                   | <i>Adamtsl2</i>      | 16.238                       | 7.237                          |
| Tyrosine aminotransferase                                       | <i>Tat</i>           | 16.165                       | 4.3715                         |
| Family with sequence similarity 107, member A                   | <i>Fam107a</i>       | 15.610                       | 37.563                         |
| RIKEN cDNA 6030422H21 gene                                      | <i>6030422H21Rik</i> | 14.278                       | 19.329                         |
| Glutathione S-transferase, alpha 3                              | <i>Gsta3</i>         | 11.449                       | 4.106                          |
| FK506 binding protein 5                                         | <i>Fkbp5</i>         | 11.371                       | 18.787                         |
| Tachykinin 4                                                    | <i>Tac4</i>          | 10.093                       | 4.826                          |
| Hydroxysteroid 11-beta dehydrogenase 2                          | <i>Hsd11b2</i>       | 9.822                        | 20.277                         |
| CD163 antigen                                                   | <i>Cd163</i>         | 9.567                        | 5.267                          |
| Angiotensinogen (serpin peptidase inhibitor, clade A, member 8) | <i>Agt</i>           | 8.384                        | 2.768                          |
| RIKEN cDNA E030003E18 gene                                      | <i>E030003E18Rik</i> | 8.239                        | 4.352                          |
| D4, zinc and double PHD fingers family 1                        | <i>Dpfl</i>          | 8.101                        | 4.712                          |

|                                                                                            |                      |        |        |
|--------------------------------------------------------------------------------------------|----------------------|--------|--------|
| Cytochrome P450, family 1, subfamily b, polypeptide 1                                      | <i>Cyp1b1</i>        | 7.445  | 2.613  |
| RIKEN cDNA E230001N04 gene                                                                 | <i>E230001N04Rik</i> | 6.907  | 16.070 |
| Nuclear factor, interleukin 3, regulated                                                   | <i>Nfil3</i>         | 6.765  | 3.447  |
| Carcolipin                                                                                 | <i>Sln</i>           | 6.741  | 3.672  |
| Abhydrolase domain containing 15                                                           | <i>Abhd15</i>        | 5.866  | 3.452  |
| Mitogen-activated protein kinase kinase kinase 6                                           | <i>Map3k6</i>        | 5.502  | 8.894  |
| Pancreatic lipase-related protein 2                                                        | <i>Pnliprp2</i>      | 5.477  | 10.191 |
| Serum/glucocorticoid regulated kinase 1                                                    | <i>Sgk1</i>          | 5.092  | 2.836  |
| Transcription factor 23                                                                    | <i>Tcf23</i>         | 4.888  | 9.674  |
| Membrane-spanning 4-domains, subfamily A, member 6D                                        | <i>Ms4a6d</i>        | 4.562  | 2.199  |
| Immunoglobulin superfamily, member 21                                                      | <i>Igsf21</i>        | 4.392  | 2.391  |
| Family with sequence similarity 65, member B                                               | <i>Fam65b</i>        | 4.145  | 7.447  |
| Coagulation factor II (thrombin) receptor                                                  | <i>F2r</i>           | 4.042  | 7.856  |
| Signal peptide, CUB domain, EGF-like 2                                                     | <i>Scube2</i>        | 3.953  | 8.107  |
| Family with sequence similarity 159, member B                                              | <i>Fam159b</i>       | 3.769  | 1.636  |
| Spondin 1, (f-spondin) extracellular matrix protein                                        | <i>Spon1</i>         | 3.649  | 9.735  |
| Sulfotransferase family 1A, phenol-preferring, member 1                                    | <i>Sult1a1</i>       | 3.502  | 7.393  |
| Adenylate cyclase 1                                                                        | <i>Adcy1</i>         | 3.271  | 6.035  |
| Family with sequence similarity 169, member A                                              | <i>Fam169a</i>       | 3.098  | 5.464  |
| Phospholipase D1                                                                           | <i>Pld1</i>          | 3.041  | 5.052  |
| Copine VII                                                                                 | <i>Cpne7</i>         | 2.895  | 6.577  |
| Circadian associated repressor of transcription                                            | <i>Ciart</i>         | 2.894  | 5.451  |
| Solute carrier family 25 (mitochondrial carrier, palmitoylcarnitine transporter), member 2 | <i>Slc25a29</i>      | 2.819  | 4.912  |
| Potassium voltage-gated channel, Shal-related family, member 2                             | <i>Kcnd2</i>         | 2.758  | 5.104  |
| RIKEN cDNA B230114P17 gene                                                                 | <i>B230114P17Rik</i> | 2.685  | 5.384  |
| Unc-13 homolog C (C. elegans)                                                              | <i>Unc13c</i>        | 2.511  | -2.094 |
| Potassium voltage-gated channel, subfamily G, member 4                                     | <i>Kcng4</i>         | 2.434  | 5.388  |
| Hedgehog interacting protein-like 1                                                        | <i>Hhip1</i>         | 2.292  | 5.164  |
| Eyes absent 4 homolog (Drosophila)                                                         | <i>Eya4</i>          | 2.193  | -2.762 |
| Opa interacting protein 5                                                                  | <i>Oip5</i>          | 1.789  | -1.347 |
| 6-phosphofructo-2-kinase/fructose-2,6-biphosphatase 1                                      | <i>Pfkfb1</i>        | 1.601  | -1.467 |
| Phosphatidic acid phosphatase type 2 domain containing 2                                   | <i>Ppapdc2</i>       | 1.555  | -1.272 |
| RIKEN cDNA 1700096K18 gene                                                                 | <i>1700096K18Rik</i> | 1.350  | -1.188 |
| cDNA sequence BC037034                                                                     | <i>BC037034</i>      | -1.143 | 1.192  |
| Growth factor receptor bound protein 2                                                     | <i>Grb2</i>          | -1.145 | 1.180  |
| Cleavage and polyadenylation specific factor 4                                             | <i>Cpsf4</i>         | -1.175 | 1.203  |
| ADP-ribosylation factor GTPase activating protein 1                                        | <i>Arfgap1</i>       | -1.179 | 1.147  |
| Zinc finger, CCHC domain containing 3                                                      | <i>Zcchc3</i>        | -1.324 | 1.449  |

|                                                              |               |         |         |
|--------------------------------------------------------------|---------------|---------|---------|
| Eukaryotic translation initiation factor 2B, subunit 4 delta | <i>Eif2b4</i> | -1.405  | 1.422   |
| Huntingtin interacting protein 1                             | <i>Hip1</i>   | -1.737  | 1.786   |
| Neurexophilin and PC-esterase domain family, member 5        | <i>Nxpe5</i>  | -2.235  | -4.825  |
| Hydroxycarboxylic acid receptor 2                            | <i>Hcar2</i>  | -2.989  | -5.793  |
| Olfactomedin 3                                               | <i>Olfm3</i>  | -3.092  | -6.161  |
| Hydrocarboxylic acid receptor 1                              | <i>Hcar1</i>  | -3.100  | -5.999  |
| Dickkopf homolog 2 ( <i>Xenopus laevis</i> )                 | <i>Dkk2</i>   | -3.297  | -5.527  |
| Guanylate binding protein 4                                  | <i>Gbp4</i>   | -5.159  | -2.612  |
| Prion protein dublet                                         | <i>Prnd</i>   | -5.600  | -14.574 |
| Polyamine modulated factor 1 binding protein 1               | <i>Pmfbp1</i> | -6.139  | -3.679  |
| Tissue inhibitor of metalloproteinase 1                      | <i>Timp1</i>  | -6.375  | -3.453  |
| Leucine rich repeat containing 55                            | <i>Lrrc55</i> | -6.540  | -16.515 |
| CD83 antigen                                                 | <i>Cd83</i>   | -6.741  | -2.990  |
| S100 calcium binding protein A9 (calgranulin B)              | <i>S100a9</i> | -7.008  | -4.985  |
| Death-associated protein kinase 2                            | <i>Dapk2</i>  | -7.103  | -4.162  |
| Spondin 2, extracellular matrix protein                      | <i>Spon2</i>  | -7.170  | -4.955  |
| G-protein coupled receptor 88                                | <i>Gpr88</i>  | -7.531  | -12.142 |
| Complement component 1, q subcomponent-like 2                | <i>C1ql2</i>  | -7.821  | -3.100  |
| Chemokine (C-C motif) ligand 2                               | <i>Ccl2</i>   | -8.850  | -5.163  |
| Chemokine (C-C motif) ligand 4                               | <i>Ccl4</i>   | -9.014  | -3.427  |
| Chemokine (C-X-C motif) ligand 5                             | <i>Cxcl5</i>  | -10.506 | -14.323 |
| Chemokine (C-C motif) ligand 7                               | <i>Ccl7</i>   | -15.957 | -6.943  |

<sup>a</sup>Values represent the fold change in gene regulation by glucocorticoids in dexamethasone-treated mice compared to vehicle-treated mice.

**Table S7. The Top Ten Diseases and Biological Functions Enriched in Glucocorticoid-Responsive Genes from the Uteri of Control and Neonatal Genistein Exposed Mice**

| <b>Control</b> |                                               |                         |                            |
|----------------|-----------------------------------------------|-------------------------|----------------------------|
| <b>Rank</b>    | <b>Diseases and Biological Functions</b>      | <b>No. of Molecules</b> | <b>p-value</b>             |
| 1              | Organismal Survival                           | 757                     | 4.14E-32 - 3.47E-07        |
| 2              | Cancer                                        | 2583                    | 2.85E-27 - 1.41E-05        |
| 3              | Organismal Injury and Abnormalities           | 2616                    | 2.85E-27 - 1.47E-05        |
| 4              | Gastrointestinal Disease                      | 2322                    | 2.53E-25 - 1.41E-05        |
| 5              | Cellular Growth and Proliferation             | 1126                    | 6.24E-23 - 8.66E-06        |
| <b>6</b>       | <b>Cell Death and Survival</b>                | <b>941</b>              | <b>3.42E-18 - 1.67E-05</b> |
| 7              | Hematological System Development and Function | 583                     | 3.4E-17 - 1.51E-05         |
| 8              | Tissue Morphology                             | 602                     | 3.4E-17 - 1.65E-05         |
| <b>9</b>       | <b>Cell Morphology</b>                        | <b>719</b>              | <b>9.58E-17 - 1.63E-05</b> |
| <b>10</b>      | <b>Connective Tissue Disorders</b>            | <b>321</b>              | <b>1.03E-16 - 5.72E-12</b> |

## Genistein

| <b>Rank</b> | <b>Diseases and Biological Functions</b>          | <b>No. of Molecules</b> | <b>p-value</b>             |
|-------------|---------------------------------------------------|-------------------------|----------------------------|
| 1           | Cancer                                            | 1566                    | 1.65E-22 - 2.04E-05        |
| 2           | Organismal Injury and Abnormalities               | 1582                    | 1.65E-22 - 2.04E-05        |
| 3           | Cellular Growth and Proliferation                 | 706                     | 5.44E-21 - 1.58E-05        |
| 4           | Hematological System Development and Function     | 407                     | 2.53E-20 - 2.04E-05        |
| 5           | Tissue Morphology                                 | 453                     | 2.53E-20 - 1.71E-05        |
| 6           | Gastrointestinal Disease                          | 1409                    | 9.22E-19 - 1.45E-05        |
| <b>7</b>    | <b>Cellular Movement</b>                          | <b>384</b>              | <b>2.33E-18 - 1.97E-05</b> |
| <b>8</b>    | <b>Lymphoid Tissue Structure and Development</b>  | <b>284</b>              | <b>7.14E-18 - 6.58E-06</b> |
| <b>9</b>    | <b>Connective Tissue Development and Function</b> | <b>344</b>              | <b>8.92E-18 - 1.02E-05</b> |
| 10          | Organismal Survival                               | 446                     | 1.47E-17 - 2.22E-06        |

Bolded rows represent functions unique to treatment within the top ten diseases and biological functions enriched in glucocorticoid-responsive genes from the uteri of control and genistein-exposed mice.

**Table S8. Gene Ontology Analysis of Genes Differentially Regulated in Response to Dexamethasone from Uterine Tissue of Postnatal Control Animals**

| <b>#</b> | <b>Annotation</b>                                                    | <b>No. of Genes</b> | <b>Bayes factor</b> | <b>p value</b> |
|----------|----------------------------------------------------------------------|---------------------|---------------------|----------------|
| 1        | GO:0007606 [6]: sensory perception of chemical stimulus              | 13                  | 120.91              | <0.0001        |
| 2        | GO:0007608 [7]: perception of smell                                  | 13                  | 114.29              | <0.0001        |
| 3        | GO:0007600 [5]: sensory perception                                   | 28                  | 104.03              | <0.0001        |
| 4        | GO:0009581 [5]: detection of external stimulus                       | 30                  | 101.34              | <0.0001        |
| 5        | GO:0050877 [4]: neurophysiological process                           | 45                  | 91.75               | <0.0001        |
| 6        | GO:0009605 [4]: response to external stimulus                        | 104                 | 84.53               | <0.0001        |
| 7        | GO:0007186 [6]: G-protein coupled receptor protein signaling pathway | 94                  | 67.09               | <0.0001        |
| 8        | GO:0050896 [3]: response to stimulus                                 | 184                 | 59.5                | <0.0001        |
| 9        | GO:0050874 [3]: organismal physiological process                     | 168                 | 44.51               | <0.0001        |
| 10       | GO:0050875 [3]: cellular physiological process                       | 1167                | 41.17               | <0.0001        |
| 11       | GO:0008152 [3]: metabolism                                           | 855                 | 28.63               | <0.0001        |
| 12       | GO:0007166 [5]: cell surface receptor linked signal transduction     | 180                 | 28.58               | <0.0001        |
| 13       | GO:0044237 [4]: cellular metabolism                                  | 804                 | 25.3                | <0.0001        |
| 14       | GO:0044238 [4]: primary metabolism                                   | 766                 | 21.01               | <0.0001        |
| 15       | GO:0050789 [2]: regulation of biological process                     | 375                 | 13.39               | <0.0001        |
| 16       | GO:0050793 [3]: regulation of development                            | 45                  | 9.66                | <0.0001        |
| 17       | GO:0007275 [2]: development                                          | 270                 | 8.33                | <0.0001        |
| 18       | GO:0050794 [3]: regulation of cellular process                       | 112                 | 7.4                 | <0.0001        |
| 19       | GO:0007154 [3]: cell communication                                   | 379                 | 6.94                | <0.0001        |
| 20       | GO:0007242 [5]: intracellular signaling cascade                      | 125                 | 6.42                | <0.0001        |



|    |                                                     |     |      |         |
|----|-----------------------------------------------------|-----|------|---------|
| 21 | GO:0009653 [3]: morphogenesis                       | 189 | 6.35 | <0.0001 |
| 22 | GO:0040008 [4]: regulation of growth                | 24  | 6.33 | <0.0001 |
| 23 | GO:0050791 [3]: regulation of physiological process | 322 | 6.1  | <0.0001 |
| 24 | GO:0006793 [5]: phosphorus metabolism               | 115 | 5.97 | <0.0001 |
| 25 | GO:0006796 [6]: phosphate metabolism                | 115 | 5.97 | <0.0001 |
| 26 | GO:0006464 [7]: protein modification                | 188 | 5.4  | 0.0001  |
| 27 | GO:0006915 [6]: apoptosis                           | 75  | 5.33 | 0.0001  |

**Table S9. Gene Ontology Analysis of Genes Differentially Regulated in Response to Dexamethasone from Uterine Tissue of Postnatal Genistein Treated Animals**

| #  | <u>Annotation</u>                                                    | <u>No. of Genes</u> | <u>Bayes factor</u> | <u>p value</u> |
|----|----------------------------------------------------------------------|---------------------|---------------------|----------------|
| 1  | GO:0007606 [6]: sensory perception of chemical stimulus              | 5                   | 76.5                | <0.0001        |
| 2  | GO:0007608 [7]: perception of smell                                  | 5                   | 72.5                | <0.0001        |
| 3  | GO:0007600 [5]: sensory perception                                   | 15                  | 62.5                | <0.0001        |
| 4  | GO:0009581 [5]: detection of external stimulus                       | 16                  | 61.21               | <0.0001        |
| 5  | GO:0050877 [4]: neurophysiological process                           | 26                  | 53.36               | <0.0001        |
| 6  | GO:0009605 [4]: response to external stimulus                        | 75                  | 34.49               | <0.0001        |
| 7  | GO:0007186 [6]: G-protein coupled receptor protein signaling pathway | 60                  | 33.71               | <0.0001        |
| 8  | GO:0050896 [3]: response to stimulus                                 | 125                 | 22.55               | <0.0001        |
| 9  | GO:0050874 [3]: organismal physiological process                     | 105                 | 21.53               | <0.0001        |
| 10 | GO:0050875 [3]: cellular physiological process                       | 695                 | 17.94               | <0.0001        |
| 11 | GO:0007166 [5]: cell surface receptor linked signal transduction     | 115                 | 11.39               | <0.0001        |
| 12 | GO:0007275 [2]: development                                          | 177                 | 9.08                | <0.0001        |
| 13 | GO:0006915 [6]: apoptosis                                            | 55                  | 8.23                | <0.0001        |
| 14 | GO:0012501 [5]: programmed cell death                                | 55                  | 7.72                | <0.0001        |
| 15 | GO:0050794 [3]: regulation of cellular process                       | 76                  | 7.63                | <0.0001        |
| 16 | GO:0008152 [3]: metabolism                                           | 493                 | 7.06                | <0.0001        |
| 17 | GO:0050789 [2]: regulation of biological process                     | 227                 | 6.6                 | <0.0001        |
| 18 | GO:0050793 [3]: regulation of development                            | 30                  | 6.53                | <0.0001        |
| 19 | GO:0009653 [3]: morphogenesis                                        | 122                 | 5.52                | 0.0001         |
| 20 | GO:0030154 [3]: cell differentiation                                 | 48                  | 5.38                | 0.0001         |
| 21 | GO:0008219 [4]: cell death                                           | 55                  | 5.37                | 0.0001         |
| 22 | GO:0016265 [3]: death                                                | 55                  | 5                   | 0.0002         |

**Table S10. Anti-correlated genes commonly regulated in control and genistein-exposed mice**

| Gene Symbol | Gene Name                                           | Control Fold-Change | Genistein Fold-Change |
|-------------|-----------------------------------------------------|---------------------|-----------------------|
| BC037034    | cDNA sequence BC037034                              | -1.14348            | 1.19282               |
| Grb2        | growth factor receptor bound protein 2              | -1.14571            | 1.18027               |
| Cpsf4       | cleavage and polyadenylation specific factor 4      | -1.17573            | 1.20376               |
| Arfgap1     | ADP-ribosylation factor GTPase activating protein 1 | -1.17986            | 1.14785               |

|               |                                                              |          |          |
|---------------|--------------------------------------------------------------|----------|----------|
| Zcchc3        | zinc finger, CCHC domain containing 3                        | -1.32435 | 1.44911  |
| Eif2b4        | eukaryotic translation initiation factor 2B, subunit 4 delta | -1.40553 | 1.42271  |
| Hip1          | huntingtin interacting protein 1                             | -1.73779 | 1.78622  |
| Unc13c        | unc-13 homolog C (C. elegans)                                | 2.51197  | -2.09401 |
| Eya4          | eyes absent 4 homolog (Drosophila)                           | 2.1935   | -2.76218 |
| Oip5          | Opa interacting protein 5                                    | 1.78929  | -1.34715 |
| Pfkfb1        | 6-phosphofructo-2-kinase/fructose-2,6-biphosphatase 1        | 1.60198  | -1.46713 |
| Ppapdc2       | phosphatidic acid phosphatase type 2 domain containing 2     | 1.55539  | -1.27298 |
| 1700096K18Rik | RIKEN cDNA 1700096K18 gene                                   | 1.35091  | -1.18865 |
